# Supplementary material for: The cleaner, the greener? Product sustainability assessment of the biomimetic façade paint Lotusan® in comparison to the conventional façade paint Jumbosil®
Source: publisher site journal article supplement (doi:10.3762/bjnano.7.200), 2016-12-29
Supplement: Additional file 1 [file 2190-4286-7-200-S1.pdf]

## **Supporting Information**

for

### **The cleaner, the greener? Product sustainability assessment of the biomimetic façade paint Lotusan® in comparison to the conventional façade paint Jumbosil®**

Florian Antony<sup>1,2,3</sup>, Rainer Grießhammer<sup>2</sup>, Thomas Speck<sup>1,3,4,5</sup> and Olga Speck\*<sup>1,3,5</sup>

Address: <sup>1</sup>Plant Biomechanics Group, Botanic Garden, Faculty of Biology, University of Freiburg, 79104 Freiburg, Germany, <sup>2</sup>Öko-Institut e.V., Institute for Applied Ecology, 79017 Freiburg, Germany, <sup>3</sup>Competence Network Biomimetics, Germany, <sup>4</sup>Freiburg Materials Research Center (FMF), 79104 Freiburg, Germany and <sup>5</sup>Freiburg Centre for Interactive Materials and Bioinspired Technologies (FIT), 79110 Freiburg, Germany

Email: Olga Speck\* - [olga.speck@biologie.uni-freiburg.de](mailto:olga.speck@biologie.uni-freiburg.de)

\* Corresponding author

### **Detailed data**

**Table S1:** Comparison of the bill of formulation components for the two façade paints Lotusan<sup>®</sup> and Jumbosil<sup>®</sup>.

| <b>Material</b>                                      | <b>Lotusan<sup>®</sup></b><br>[mass %] | <b>Jumbosil<sup>®</sup></b><br>[mass %] | <b>Used dataset (ecoinvent V3.01) [1]</b>                                                                                                                                              |
|------------------------------------------------------|----------------------------------------|-----------------------------------------|----------------------------------------------------------------------------------------------------------------------------------------------------------------------------------------|
| Water-based polymer dispersion; 50 % styrene-acrylic | 10                                     | 23.8                                    | 25 % styrene production [RER] + 12.5 % methyl methacrylate production [RER] + 50 % market for tap water, at user [Europe without Switzerland] + 12.5 % butyl acrylate production [RER] |
| Pigment, titanium dioxide (TiO <sub>2</sub> )        | 20                                     | 10                                      | Market for titanium dioxide [RER]                                                                                                                                                      |
| Filler (rock flour)                                  | 34.4                                   | 44.4                                    | Limestone production, crushed, for mill [CH]                                                                                                                                           |
| Aliphatic solvents                                   | 0.5                                    | 0.9                                     | 50% chemical production, inorganic [GLO] + 50 % chemical production, organic [GLO]                                                                                                     |
| Glycol ether                                         | ---                                    | 1                                       | 50% chemical production, inorganic [GLO] + 50 % chemical production, organic [GLO]                                                                                                     |
| In-can preservation                                  | ---                                    | 0.6                                     | 50% chemical production, inorganic [GLO] + 50 % chemical production, organic [GLO]                                                                                                     |
| Film preservation                                    | ---                                    | 0.4                                     | 50% chemical production, inorganic [GLO] + 50% chemical production, organic [GLO]                                                                                                      |
| Dispersing agent                                     | 0.1                                    | 0.4                                     | 50% chemical production, inorganic [GLO] + 50% chemical production, organic [GLO]                                                                                                      |
| Defoaming agent                                      | 0.2                                    | 0.2                                     | 50% chemical production, inorganic [GLO] + 50% chemical production, organic [GLO]                                                                                                      |
| Methyl cellulose                                     | 0.1                                    | 0.2                                     | 50% chemical production, inorganic [GLO] + 50% chemical production, organic [GLO]                                                                                                      |
| Thickener                                            | 0.5                                    | 0.2                                     | 50% chemical production, inorganic [GLO] + 50% chemical production, organic [GLO]                                                                                                      |
| Water                                                | 28.2                                   | 38.3                                    | Tap, water at user [RER]                                                                                                                                                               |
| Hydrophobizing agent                                 | 1                                      | ---                                     | Silicone product production [RER]                                                                                                                                                      |
| Fibres (cellulose)                                   | 1                                      | ---                                     | Cellulose fibre production, inclusive blowing in [CH]                                                                                                                                  |
| Silicone resin                                       | 4                                      | ---                                     | Silicone product production [RER]                                                                                                                                                      |
| <b>Total</b>                                         | <b>100</b>                             | <b>100</b>                              |                                                                                                                                                                                        |

**Table S2:** Environmental impact categories observed within this study.

| Valuation System                  | Impact Indicator                         | Abbreviation          | Unit          | Short Description                                                                                                                                                                                                                                                                                                                                                                                                                                                                                                                                                                    | Source/citation |
|-----------------------------------|------------------------------------------|-----------------------|---------------|--------------------------------------------------------------------------------------------------------------------------------------------------------------------------------------------------------------------------------------------------------------------------------------------------------------------------------------------------------------------------------------------------------------------------------------------------------------------------------------------------------------------------------------------------------------------------------------|-----------------|
| <b>Cumulative Energy Demand</b>   | Cumulative Fossil Energy Demand          | $CED_{fossil}$        | MJ            | Summarizes the total energy input of all fossil forms of energy as a value or primary energy demand. The $CED_{fossil}$ is given in MJ.                                                                                                                                                                                                                                                                                                                                                                                                                                              | [2]             |
|                                   | Cumulative Nuclear Energy Demand         | $CED_{nuclear}$       | MJ            | Summarizes the total energy input of nuclear energy as a value or primary energy demand. The $CED_{nuclear}$ is given in MJ.                                                                                                                                                                                                                                                                                                                                                                                                                                                         |                 |
|                                   | Cumulative Non-renewable Energy Demand   | $CED_{non-renewable}$ | MJ            | Summarizes the total energy input of all not renewable forms of energy as a value or primary energy demand. The $CED_{non-renewable}$ is given in MJ.                                                                                                                                                                                                                                                                                                                                                                                                                                |                 |
| <b>IPCC 2007</b>                  | 100 years Global Warming Potential       | $GWP_{100a}$          | $kg\ CO_2e^a$ | Based on the anthropogenic greenhouse gas emissions. All greenhouse gas emissions are summed up, whereby the gases' specific Global Warming Potential is expressed in comparison to the $CO_2$ . The GWP is given in units of kilograms of $CO_2$ equivalent, which means that amount of $CO_2$ that has the same degree of effectiveness as another greenhouse gas.                                                                                                                                                                                                                 | [3]             |
| <b>ReCiPe Midpoint (H) w/o LT</b> | Water Depletion Potential                | WDP                   | $m^3$         | Freshwater is not only a scarce resource in many regions; it is an indispensable prerequisite for many organisms. Furthermore, freshwater can be seen as a renewable abiotic resource, that is irreversible exhausted only in few processes (i.e. hydrolysis of cement in concrete production). The impact indicator WDP regards the usage of water in terms of used water volume. WDP is a life cycle inventory indicator, with an only formal characterization factor of $1m^3/m^3$ for all types of water, regardless of its source and for example local or regional scarcities. | [2]             |
|                                   | Terrestrial Acidification w/o LT, w/o LT | TAP 100               | $kg\ SO_2e^1$ | A lowering of the soil pH value is mainly caused by sulphur dioxide, ammonia, and nitrogen oxides. Sulphur dioxide is the key indicator for the quantification of the acidification potential. All other emissions with a pH value lowering effect are therefore related to the effectiveness of sulphur dioxide equivalents.                                                                                                                                                                                                                                                        |                 |
|                                   | Freshwater Eutrophication Potential      | FEP                   | $kg\ Pe^1$    | Describes the potential for excessive accumulation of freshwaters and is also called "over-fertilization" potential. The FEP is given as kg phosphor equivalent                                                                                                                                                                                                                                                                                                                                                                                                                      |                 |
|                                   | Marine Eutrophication Potential          | MEP                   | $kg\ Ne^1$    | Describes the potential for excessive accumulation of marine waters and is also called "over-fertilization" potential. The MEP is given as kg nitrogen equivalent                                                                                                                                                                                                                                                                                                                                                                                                                    |                 |
|                                   | Photochemical Ozone Formation Potential  | POFP                  | $kg\ NMVOC$   | As a result of chemical reactions of nitrogen oxides with volatile organic compounds under the influence of ultraviolet light, ozone results from photochemical reaction in near-ground air layers. The key indicator is defined as kg non-                                                                                                                                                                                                                                                                                                                                          |                 |

| Valuation System | Impact Indicator                       | Abbreviation               | Unit                  | Short Description                                                                                                                                                                                                                                                                                             | Source/citation |
|------------------|----------------------------------------|----------------------------|-----------------------|---------------------------------------------------------------------------------------------------------------------------------------------------------------------------------------------------------------------------------------------------------------------------------------------------------------|-----------------|
|                  |                                        |                            |                       | methane volatile organic compound.                                                                                                                                                                                                                                                                            |                 |
|                  | Agricultural Land Occupation Potential | ALOP                       | m <sup>2</sup> *a     | The indicator Agricultural land occupation potential adds up to the amount of agriculturally used land, needed to fulfil the function of an investigated product system. It is expressed in the unit square meter multiplied with one year as a time factor.                                                  |                 |
|                  | Particulate Matter Formation Potential | PMFP                       | kg PM10e <sup>1</sup> | Describes the Potential of a product or product system to build Particulate Matter. It is expressed in the unit PM10 equivalents which mean particles with an average diameter of about 10 µm.                                                                                                                |                 |
| USEtox           | Human Toxicity, total                  | USEtox <sub>humantox</sub> | CTU <sub>h</sub>      | The USEtox human toxicity potential is expressed in comparative toxic units (CTU <sub>h</sub> ), the estimated increase in morbidity in the total human population, per unit mass of a chemical emitted. The indicator CTU <sub>h</sub> per kg emitted can also be described as disease cases per kg emitted. | [2]             |
|                  | Ecotoxicity, total                     | USEtox <sub>ecotox</sub>   | CTU <sub>e</sub>      | The USEtox ecotoxicity potential (aquatic ecotoxicity impacts) is also expressed in comparative toxic units (CTU <sub>e</sub> ), an estimate of the potentially affected fraction of species (PAF) integrated over time and volume per unit mas of a chemical emitted.                                        |                 |

<sup>a</sup>The letter “e” stands for “equivalent”.

**Table S3:** Contribution to impact categories by life cycle stages for the two compared paints given as absolute values and in terms of the relative share of each overall result.<sup>a</sup>

| Impact category<br>[Unit]                     | Façade paint | Bill of Materials |       | Packaging |       | Production |       | Distribution |      | Use Phase |       | End of Life-Treatment |      | Sum     |        |
|-----------------------------------------------|--------------|-------------------|-------|-----------|-------|------------|-------|--------------|------|-----------|-------|-----------------------|------|---------|--------|
|                                               |              | abs.              | rel.  | abs.      | rel.  | abs.       | rel.  | abs.         | rel. | abs.      | rel.  | abs.                  | rel. | abs.    | rel.   |
| CED <sub>non-renewable</sub><br>[MJ]          | Lotusan®     | 5.2E+03           | 55.8% | 6.7E+02   | 7.2%  | 2.8E+02    | 3.0%  | 6.7E+02      | 7.1% | 2.5E+03   | 26.3% | 4.8E+01               | 0.5% | 9.3E+03 | 100.0% |
|                                               | Jumbosil®    | 8.9E+03           | 62.1% | 9.3E+02   | 6.5%  | 4.0E+02    | 2.8%  | 9.5E+02      | 6.6% | 3.1E+03   | 21.4% | 6.9E+01               | 0.5% | 1.4E+04 | 100.0% |
| GWP <sub>100a</sub><br>[kg CO <sub>2</sub> e] | Lotusan®     | 3.7E+02           | 57.0% | 2.4E+01   | 3.7%  | 1.8E+01    | 2.7%  | 4.1E+01      | 6.4% | 1.6E+02   | 24.4% | 3.8E+01               | 5.9% | 6.4E+02 | 100.0% |
|                                               | Jumbosil®    | 5.2E+02           | 58.7% | 3.4E+01   | 3.8%  | 2.5E+01    | 2.8%  | 5.9E+01      | 6.6% | 2.0E+02   | 22.0% | 5.4E+01               | 6.1% | 8.9E+02 | 100.0% |
| WDP<br>[m <sup>3</sup> ]                      | Lotusan®     | 4.3E+00           | 89.5% | 7.5E-02   | 1.5%  | 1.7E-01    | 3.5%  | 4.6E-02      | 0.9% | 2.0E-01   | 4.1%  | 1.7E-02               | 0.4% | 4.8E+00 | 100.0% |
|                                               | Jumbosil®    | 3.1E+00           | 81.9% | 1.0E-01   | 2.7%  | 2.5E-01    | 6.5%  | 6.5E-02      | 1.7% | 2.5E-01   | 6.5%  | 2.4E-02               | 0.6% | 3.8E+00 | 100.0% |
| TAP <sub>100a</sub><br>[kg SO <sub>2</sub> e] | Lotusan®     | 2.2E+00           | 74.4% | 8.8E-02   | 3.0%  | 2.4E-02    | 0.8%  | 1.4E-01      | 4.8% | 4.8E-01   | 16.5% | 1.4E-02               | 0.5% | 2.9E+00 | 100.0% |
|                                               | Jumbosil®    | 3.1E+00           | 76.1% | 1.2E-01   | 3.0%  | 3.4E-02    | 0.8%  | 2.0E-01      | 4.9% | 6.0E-01   | 14.7% | 1.9E-02               | 0.5% | 4.1E+00 | 100.0% |
| FEP<br>[kg Pe]                                | Lotusan®     | 1.2E-01           | 72.2% | 6.3E-03   | 3.8%  | 2.0E-02    | 11.7% | 4.6E-03      | 2.7% | 1.6E-02   | 9.5%  | 1.8E-04               | 0.1% | 1.7E-01 | 100.0% |
|                                               | Jumbosil®    | 1.1E-01           | 63.9% | 8.7E-03   | 5.0%  | 2.8E-02    | 16.0% | 6.5E-03      | 3.7% | 2.0E-02   | 11.2% | 2.5E-04               | 0.1% | 1.8E-01 | 100.0% |
| MEP<br>[kg Ne]                                | Lotusan®     | 1.3E-01           | 76.3% | 4.2E-03   | 2.4%  | 5.8E-03    | 3.3%  | 7.0E-03      | 4.1% | 2.3E-02   | 13.3% | 9.7E-04               | 0.6% | 1.7E-01 | 100.0% |
|                                               | Jumbosil®    | 1.6E-01           | 74.7% | 5.8E-03   | 2.7%  | 8.3E-03    | 3.9%  | 1.0E-02      | 4.7% | 2.9E-02   | 13.4% | 1.4E-03               | 0.7% | 2.1E-01 | 100.0% |
| POFP<br>[kg NMVOC]                            | Lotusan®     | 1.5E+00           | 58.9% | 8.3E-02   | 3.4%  | 1.9E-02    | 0.8%  | 2.1E-01      | 8.6% | 6.8E-01   | 27.3% | 2.5E-02               | 1.0% | 2.5E+00 | 100.0% |
|                                               | Jumbosil®    | 1.9E+00           | 58.5% | 1.2E-01   | 3.6%  | 2.7E-02    | 0.9%  | 3.1E-01      | 9.5% | 8.5E-01   | 26.4% | 3.6E-02               | 1.1% | 3.2E+00 | 100.0% |
| ALOP<br>[m <sup>2</sup> a]                    | Lotusan®     | 1.9E+01           | 60.0% | 8.6E+00   | 26.7% | 5.8E-01    | 1.8%  | 7.0E-01      | 2.2% | 2.6E+00   | 8.2%  | 4.1E-01               | 1.3% | 3.2E+01 | 100.0% |
|                                               | Jumbosil®    | 1.2E+01           | 40.6% | 1.2E+01   | 40.6% | 8.3E-01    | 2.7%  | 1.0E+00      | 3.3% | 3.3E+00   | 10.8% | 5.9E-01               | 1.9% | 3.1E+01 | 100.0% |
| USEtox <sub>humantox</sub><br>[CTU]           | Lotusan®     | 5.2E-05           | 68.7% | 4.0E-06   | 5.4%  | 6.2E-07    | 0.8%  | 3.3E-06      | 4.4% | 1.5E-05   | 20.0% | 5.1E-07               | 0.7% | 7.5E-05 | 100.0% |
|                                               | Jumbosil®    | 4.7E-05           | 60.8% | 5.6E-06   | 7.3%  | 8.9E-07    | 1.2%  | 4.7E-06      | 6.2% | 1.9E-05   | 24.6% | 0.0E+00               | 0.0% | 7.7E-05 | 100.0% |
| USEtox <sub>ecotox</sub><br>[CTU]             | Lotusan®     | 1.3E+03           | 90.5% | 1.1E+01   | 0.7%  | 2.1E+00    | 0.1%  | 2.2E+01      | 1.5% | 9.8E+01   | 6.8%  | 4.3E+00               | 0.3% | 1.4E+03 | 100.0% |
|                                               | Jumbosil®    | 1.0E+03           | 85.2% | 1.6E+01   | 1.3%  | 3.1E+00    | 0.3%  | 3.1E+01      | 2.6% | 1.2E+02   | 10.2% | 6.2E+00               | 0.5% | 1.2E+03 | 100.0% |
| PMFP<br>[PM10e]                               | Lotusan®     | 9.0E-01           | 70.7% | 3.9E-02   | 3.0%  | 8.6E-03    | 0.7%  | 7.0E-02      | 5.5% | 2.5E-01   | 19.6% | 6.6E-03               | 0.5% | 1.3E+00 | 100.0% |
|                                               | Jumbosil®    | 9.5E-01           | 65.9% | 5.4E-02   | 3.8%  | 1.3E-02    | 0.9%  | 1.0E-01      | 7.0% | 3.1E-01   | 21.8% | 9.3E-03               | 0.7% | 1.4E+00 | 100.0% |

<sup>a</sup>All values are related to the functional unit. It has to be noted that values may contain impact indicator-specific rounding differences.

**Table S4:** Detailed analysis for the contributions arising from the bill of formulation components<sup>a</sup>.

| Impact category              | Façade paint          | Water  | Pigment (TiO <sub>2</sub> ) | Polymer dispersion (butyl acrylate) | Polymer dispersion (methyl methacrylate) | Polymer dispersion (styrene) | Polymer dispersion (water) | Filler (rock flour) | Chemicals , inorganic | Chemicals , organic | Fibres (cellulose) | Silicone resin | Hydrophobizing agent | Transport services | Sum  |
|------------------------------|-----------------------|--------|-----------------------------|-------------------------------------|------------------------------------------|------------------------------|----------------------------|---------------------|-----------------------|---------------------|--------------------|----------------|----------------------|--------------------|------|
| CED <sub>non-renewable</sub> | Lotusan <sup>®</sup>  | 0.01%  | 68.47%                      | 3.96%                               | 5.06%                                    | 6.65%                        | <0.01%                     | 0.04%               | 0.76%                 | 1.39%               | 0.15%              | 9.52%          | 2.48%                | 1.50%              | 100% |
|                              | Jumbosil <sup>®</sup> | 0.01%  | 38.01%                      | 13.78%                              | 18.22%                                   | 22.43%                       | 0.01%                      | 0.04%               | 2.14%                 | 3.56%               | ---                | ---            | ---                  | 1.80%              | 100% |
| GWP <sub>100a</sub>          | Lotusan <sup>®</sup>  | 0.01%  | 72.24%                      | 2.94%                               | 4.70%                                    | 7.05%                        | <0.01%                     | 0.05%               | 1.17%                 | 0.59%               | 0.10%              | 7.05%          | 1.76%                | 2.35%              | 100% |
|                              | Jumbosil <sup>®</sup> | <0.01% | 36.28%                      | 11.30%                              | 18.44%                                   | 25.58%                       | <0.01%                     | 0.06%               | 2.38%                 | 2.38%               | ---                | ---            | ---                  | 3.57%              | 100% |
| WDP                          | Lotusan <sup>®</sup>  | 1.49%  | 93.62%                      | 0.41%                               | 0.05%                                    | 0.52%                        | 0.26%                      | 0.31%               | 0.36%                 | 0.10%               | 0.05%              | 2.11%          | 0.53%                | 0.18%              | 100% |
|                              | Jumbosil <sup>®</sup> | 1.78%  | 86.16%                      | 2.78%                               | 0.35%                                    | 3.58%                        | 1.80%                      | 0.73%               | 1.86%                 | 0.49%               | ---                | ---            | ---                  | 0.47%              | 100% |
| TAP <sub>100a</sub>          | Lotusan <sup>®</sup>  | <0.01% | 83.75%                      | 1.92%                               | 3.20%                                    | 2.57%                        | <0.01%                     | 0.12%               | 0.93%                 | 0.51%               | 0.08%              | 4.75%          | 1.19%                | 0.97%              | 100% |
|                              | Jumbosil <sup>®</sup> | <0.01% | 60.18%                      | 8.32%                               | 13.86%                                   | 11.11%                       | <0.01%                     | 0.18%               | 3.04%                 | 1.68%               | ---                | ---            | ---                  | 1.62%              | 100% |
| FEP                          | Lotusan <sup>®</sup>  | 0.01%  | 84.96%                      | 1.77%                               | 0.67%                                    | 2.49%                        | <0.01%                     | 0.02%               | 1.02%                 | 0.49%               | 0.14%              | 6.74%          | 1.68%                | 0.01%              | 100% |
|                              | Jumbosil <sup>®</sup> | 0.01%  | 65.40%                      | 10.07%                              | 3.81%                                    | 14.18%                       | 0.01%                      | 0.03%               | 4.36%                 | 2.10%               | ---                | ---            | ---                  | 0.02%              | 100% |
| MEP                          | Lotusan <sup>®</sup>  | <0.01% | 73.86%                      | 1.01%                               | 5.99%                                    | 1.60%                        | <0.01%                     | 0.13%               | 0.66%                 | 0.33%               | 0.17%              | 5.57%          | 1.39%                | 9.29%              | 100% |
|                              | Jumbosil <sup>®</sup> | <0.01% | 43.50%                      | 4.41%                               | 26.10%                                   | 6.96%                        | <0.01%                     | 0.20%               | 2.18%                 | 1.08%               | ---                | ---            | ---                  | 15.56%             | 100% |
| POFP                         | Lotusan <sup>®</sup>  | <0.01% | 76.43%                      | 2.49%                               | 4.93%                                    | 4.15%                        | <0.01%                     | 0.29%               | 0.78%                 | 0.86%               | 0.14%              | 5.91%          | 1.48%                | 2.55%              | 100% |
|                              | Jumbosil <sup>®</sup> | <0.01% | 42.74%                      | 10.24%                              | 20.38%                                   | 17.06%                       | <0.01%                     | 0.41%               | 2.44%                 | 2.68%               | ---                | ---            | ---                  | 4.04%              | 100% |
| ALOP                         | Lotusan <sup>®</sup>  | 0.01%  | 63.06%                      | 1.50%                               | 0.03%                                    | 1.74%                        | <0.01%                     | 0.03%               | 1.07%                 | 0.18%               | 7.08%              | 21.02%         | 4.28%                | <0.01%             | 100% |
|                              | Jumbosil <sup>®</sup> | 0.01%  | 66.94%                      | 11.74%                              | 0.20%                                    | 13.63%                       | 0.01%                      | 0.09%               | 6.34%                 | 1.04%               | ---                | ---            | ---                  | 0.01%              | 100% |
| USEtox <sub>humantox</sub>   | Lotusan <sup>®</sup>  | 0.01%  | 89.43%                      | 1.29%                               | 0.44%                                    | 2.04%                        | <0.01%                     | 0.02%               | 0.91%                 | 0.32%               | 0.19%              | 3.92%          | 0.98%                | 0.45%              | 100% |
|                              | Jumbosil <sup>®</sup> | 0.01%  | 71.29%                      | 7.60%                               | 2.59%                                    | 11.99%                       | 0.01%                      | 0.05%               | 4.03%                 | 1.41%               | ---                | ---            | ---                  | 1.03%              | 100% |
| USEtox <sub>ecotox</sub>     | Lotusan <sup>®</sup>  | <0.01% | 97.46%                      | 0.16%                               | 0.11%                                    | 0.99%                        | <0.01%                     | 0.00%               | 0.33%                 | 0.11%               | 0.03%              | 0.49%          | 0.14%                | 0.16%              | 100% |
|                              | Jumbosil <sup>®</sup> | <0.01% | 89.42%                      | 1.21%                               | 0.60%                                    | 6.34%                        | <0.01%                     | 0.01%               | 1.51%                 | 0.60%               | ---                | ---            | ---                  | 0.30%              | 100% |
| PMFP                         | Lotusan <sup>®</sup>  | <0.01% | 83.59%                      | 1.84%                               | 2.59%                                    | 2.35%                        | <0.01%                     | 0.59%               | 0.85%                 | 0.54%               | 0.11%              | 5.15%          | 1.29%                | 1.10%              | 100% |
|                              | Jumbosil <sup>®</sup> | <0.01% | 57.34%                      | 9.30%                               | 13.04%                                   | 11.86%                       | <0.01%                     | 1.04%               | 3.23%                 | 2.05%               | ---                | ---            | ---                  | 2.14%              | 100% |

<sup>a</sup>Results are given for the provision of raw materials required for the production of 1 kg of each façade paint.

## References

- [1] ecoinvent Centre Ed. ecoinvent data V3.01. Swiss Centre for Life Cycle Inventories, 2013. [www.ecoinvent.org](http://www.ecoinvent.org) (accessed July 16, 2015).
- [2] Hischier, R.; Weidema, B., Eds. Implementation of Life Cycle Impact Assessment Methods. Data V2.2 2010, *ecoinvent report No. 3*, St. Gallen, Switzerland.
- [3] Change, Climate. "Intergovernmental Panel on Climate Change." World Meteorological Organization, 2007.
